# Supplementary material
Source: PubMed Central journal article supplement (PMC3318495)
Supplement: supp_194.8.1897_SuppMaterial.pdf [file supp_194.8.1897_SuppMaterial.pdf]

Supplemental Material for

The TonB3 system in the human pathogen *Vibrio vulnificus* is under the control of the global regulators Lrp and CRP.

Alejandro F. Alice and Jorge H. Crosa\*

TABLE S1. Primers used in this work

| Primer name | Sequence (5' to 3')                                 | Use                                  |
|-------------|-----------------------------------------------------|--------------------------------------|
| 42-100      | CTGCAGTCTCATGTATATCTGTGCGGAAAC                      | <i>lacZ</i> fusion                   |
| 42-300      | CTGCAGTCACTACAATAGATCCACCCTCCA                      | <i>lacZ</i> fusion/EMSA/footprinting |
| 42-400      | CTGCAGATTTGATAACCACCAGACTCATCTT                     | <i>lacZ</i> fusion                   |
| 42-498      | CTGCAGACTACATAAAAATGCAATATTGCAC                     | <i>lacZ</i> fusion/EMSA/footprinting |
| 42-632      | CTGCAGAAGTATTTGTGATGAAAGCATGAC                      | <i>lacZ</i> fusion/EMSA/footprinting |
| 42Pst       | CTGCAGCTGAACAGCTTCAATCTCTGG                         | <i>lacZ</i> fusion                   |
| 42Bam       | GGATCCTGCGAAAGCTATCGGGGACAT                         | <i>lacZ</i> fusion/EMSA/footprinting |
| 42-548      | GCTGCAGCCAATCACAGAATATCAAAGTGT                      | <i>lacZ</i> fusion                   |
| 42-300Rev   | TGTTGGAGGGTGGATCTATTGTAG                            | EMSA/footprinting                    |
| 42-dintREV  | GTTGGAGGGTGGATCTATTGTAGTCTCATTGGC<br>TGAAGCTTTAAAC  | deletion                             |
| 42-dintFOR  | GTTTAAAGCTTCAGCCAAATGAGACTACAATAGA<br>TCCACCCTCCAAC | deletion                             |
| 42-477Bam   | CGGATCCGTTAGAATGGCTGACTGTTTATTG                     | EMSA/footprinting                    |
| 42-206-For  | CTGCAGGCCAAATCACAGATAATCATGCTG                      | EMSA                                 |
| 42-206-Rev  | CAGCATGATTATCTGTGATTTGGC                            | EMSA                                 |
| M13F        | ACGTTGTAAAACGACGGCCAG                               | footprinting                         |
| M13R        | CAGGAAACAGCTATGAC                                   | footprinting                         |

|                |                                                        |                                |
|----------------|--------------------------------------------------------|--------------------------------|
| delta632-498-1 | CGCGTGCCACATGACGTCTTTCG                                | deletion                       |
| delta632-498-3 | CTGTTAGAATGGCTGACTGTTTATTGTCATGCTTT<br>CATCACAAATACTT  | deletion                       |
| delta632-498-4 | AAGTATTTGTGATGAAAGCATGACAATAAACAGT<br>CAGCCATTCTAACAG  | deletion                       |
| delta632-498-2 | TTTGC GCGAGTGTACCACCTGTG                               | deletion                       |
| Lrp-1          | AACAGCCATACGAGCAGCGTTAG                                | deletion                       |
| Lrp-2          | AAACAGCAACACCAACGTTGTAC                                | deletion                       |
| Lrp-3          | ACGTGTTTTAATCACAAAGTTGGTTCGGCTTTTTTGT<br>AGTTATCTACCAT | deletion                       |
| Lrp-4          | ATGGTAGATAACTACAAAAAGCCGAACCAACTT<br>GTGATTA AACACGT   | deletion                       |
| CRP-1          | GATGTGCTGTTTTATGAAGGACTG                               | deletion                       |
| CRP-2          | TAAAAGTGGATGAATGCTCGGAGG                               | deletion                       |
| CRP-3          | CGAGTACCGTAAACAACGATAGTCGGTTTGAGGT<br>TTACCTAGAACCAT   | deletion                       |
| CRP-4          | ATGGTTCTAGGTAAACCTCAAACCGACTATCGTT<br>GTTTACGGTACTCG   | deletion                       |
| Lrp-revSAC     | GGAGCTCTGCCGCTCGGATTCATAAGTC                           | Complementation/pET200 cloning |
| Lrp-ForPET     | CACCATGGTAGATAACTACAAAAAGCCG                           | pET200 cloning                 |
| Lrp-ForPST     | GCTGCAGCTATGTGTAGGGTGTAATGTTCG                         | complementation                |
| CRP-pETFOR     | CACCATGGTTCTAGGTAAACCTCAAACC                           | pET200 cloning                 |
| CRP-REVSAC     | GGAGCTCGTTTGCTGCTGAAGCGTAGTGCTC                        | complementation/pET200 cloning |
| CRP-           | TTCTAGACCGTGATCATGTGCACAGTTTTGC                        | complemen-                     |

---

|             |                         |         |
|-------------|-------------------------|---------|
| FORXBA      |                         | tation  |
| TONB3F-qRT  | TCTTGAGTTCACCGTCAACG    | qRT-PCR |
| TONB3R-qRT  | GTTTGCCATCGACCATCTTG    | qRT-PCR |
| Lrp-ForqRT  | AATGAATTGCAGAAAGATGGTCG | qRT-PCR |
| Lrp-RevqRT  | ACATGGAGTTGGAGAAAGCC    | qRT-PCR |
| CRP-qRTFOR  | GGTGACTTAGCATTCCCTAGACG | qRT-PCR |
| CRP-qRTREV  | TGACCGATTTCTTGACGAGTG   | qRT-PCR |
| 23S-Forward | AGGCATGCTGGAGGTATCAGAA  | qRT-PCR |
| 23S-Reverse | AACGTTGGACAGGAACCCTTG   | qRT-PCR |

---
